# Supplementary material
Source: PubMed Central journal article supplement (PMC3167538)
Supplement: 1108927108_pnas.201108927SI.pdf [file 1108927108_pnas.201108927SI.pdf]

# Supporting Information

Fahlke et al. 10.1073/pnas.1108927108

## SI Methods

**Specimens Studied.** Archaeocetes included in this study represent middle Eocene Protocetidae and late Eocene Basilosauridae. Specimens were screened for damage and postmortem deformation. Taphonomically and artificially deformed specimens were omitted from the analysis. To avoid a possible influence of ontogenetic changes of cranial asymmetry on our results, we only used crania of adult individuals. Species studied are: *Artiocetus clavis* (GSP-UM 3458): complete cranium of a partial skeleton collected from the middle Eocene (47 Ma) upper Habib Rahi Formation of Balochistan Province, Pakistan (1); *Qaisracetus arifi* (GSP-UM 3316): cranium of a partial skeleton collected from the middle Eocene (43 Ma) Domanda Formation of Balochistan Province, Pakistan (2); *Dorudon atrox* (UM 101222): complete cranium collected from the late Eocene (37 Ma) Birket Qarun Formation of Wadi Al Hitan, Egypt (3); *Dorudon atrox* (SMF 4451): complete cranium collected from the late Eocene (37 Ma) Birket Qarun or Qasr el-Sagha Formation of Fayum, Egypt (4); *Basilosaurus isis* (WH-74): skull pieces, reconstructed skull cast, and left and right mandibles of a virtually complete skeleton collected from the late Eocene (37 Ma) Birket Qarun Formation of Wadi Al Hitan, Egypt. Measurements of *B. isis* (SMNS 11787, complete skull from the late Eocene Birket Qarun Formation, Fayum, Egypt) were taken from a published figure (plate VII.1 in ref. 4). Specimen numbers of the comparative modern artiodactyl sample are given in Tables S1 and S2.

**Three-Dimensional Scanning and Preparation.** The cranium of *A. clavis* (GSP-UM 3458) and the dentaries of *B. isis* (WH-74) were CT-scanned (GE HD-750) in the Department of Radiology at the University Hospital, University of Michigan. In-plane resolution is 0.293 to 0.742 mm for *A. clavis* and 0.879 mm for *B. isis*; slice thickness is 0.625 mm for all samples. Surface models were generated using Amira software and enhanced using Materialise 3-matic and Magics software. The skull model was reoriented in a global  $x$ - $y$ - $z$  coordinate system using a script written in R statistical programming language (5).

Micro-CT scans (GE phoenix|X-ray v|tome|x s) of the cranium of *A. clavis* were made at the Steinmann-Institut, University of Bonn, Germany. Isotropic voxel size of the scan used is (0.198 mm)<sup>3</sup>.

**Analysis of Midline Suture Deviation.** All crania were carefully oriented and photographed in dorsal view using a long focal-length

lens to minimize parallax. Deviations were measured in Adobe Photoshop. We measured the deviation,  $\delta x$ , of the dorsal midline suture from a straight rostrocaudal axis, RC, in one-tenth increments along RC (measurements in millimeters). RC was used as a reference axis, following Ness (6), with R being a point on the midline at the tip of the rostrum and C being a point on the midline posterior to the foramen magnum bisecting the posteriormost extent of the occipital condyles (Fig. S1). Note that RC is not equivalent to the global  $x$  axis in an asymmetrical skull.

In Odontoceti, the rostrum is not affected by telescoping. Thus, a similar  $\delta x$  at the bony nares might result in different skew values for Odontoceti with different rostrum lengths (6, 7). However, archaeocete torsion does affect the rostrum (Fig. 1B). Therefore, we decided not to use Ness' calculation of skew, but sampled  $\delta x$  at nine equally spaced points along RC (dividing RC into tenths). To make the measurements size-independent we calculated deviations relative to RC ( $\delta x/RC$ ) (Fig. 2).

For a symmetrical comparative baseline sample we quantified natural variation in 24 artiodactyl skulls (two *Alces americana*, two *Antilocapra americana*, three *Bison bison*, one *Bos taurus*, one *Camelus bactrianus*, two *Camelus dromedarius*, five *Cervus canadensis*, one *Giraffa camelopardalis*, three *Hippopotamus amphibius*, one *Oreamnos montanus*, one *Sus cristatus*, and two *Sus scrofa*). Statistical significance was calculated following Sokal and Rohlf (8).

**Analysis of Deflection Angles.** We sampled coordinates of vertices along the ventral ( $n = 23$ ) and dorsal ( $n = 21$ ) midline sutures on the 3D skull model of *A. clavis*. Applying an R (5) script, 1,000 points, each separated by 0.57 mm along the  $x$  axis, were interpolated from these coordinates using a cubic spline for each suture. The deviation of a line connecting each pair of dorsal and ventral midline points from the  $xz$ -plane was taken as the deflection angle (Fig. 3).

**Analysis of Air Sinuses.** Air sinuses of *A. clavis* were reconstructed from University of Bonn micro-CT images using Amira (Fig. 1B).

**Bone-Thickness Measurements.** We measured bone thicknesses of the outer walls of both left and right dentaries of *B. isis* on a 25 × 25-mm grid using Amira software and University of Michigan CT images. The measurements were then used to create thickness maps in ESRI ArcGIS (Fig. 4).

1. Gingerich PD, Haq MU, Zalmout IS, Khan IH, Malkani MS (2001) Origin of whales from early artiodactyls: Hands and feet of Eocene Protocetidae from Pakistan. *Science* 293: 2239–2242.
2. Gingerich PD, Haq MU, Hussain Khan I, Zalmout IS (2001) Eocene stratigraphy and archaeocete whales (Mammalia, Cetacea) of Drug Lahar in the eastern Sulaiman Range, Balochistan (Pakistan). *Contributions of the Museum of Paleontology University of Michigan* 30:269–319.
3. Uhen MD (2004) Form, function, and anatomy of *Dorudon atrox* (Mammalia, Cetacea): An archaeocete from the middle to late Eocene of Egypt. *University of Michigan Papers on Paleontology* 34:1–222.
4. Stromer E (1908) Die Archaeoceti des ägyptischen Eozäns (Archaeocetes of the Egyptian Eocene). *Beiträge zur Paläontologie und Geologie Österreich-Ungarns und des Orients, Vienna*, 21:106–178 (in German).
5. R Development Core Team (2010) R: A Language and Environment for Statistical Computing, <http://www.R-project.org>. Accessed June 29, 2010.
6. Ness AR (1967) A measure of asymmetry of the skulls of odontocete whales. *J Zool* 153: 209–211.
7. Heyning JE (1989) Comparative facial anatomy of beaked whales (Ziphiidae) and a systematic revision among the families of extant Odontoceti. *Natural History Museum of Los Angeles County Contributions in Science* 405:1–64.
8. Sokal RR, Rohlf FJ (1981) *Biometry* (W. H. Freeman, New York), 2nd Ed.



Table S1. Relative midline suture deviations ( $\delta x/RC$ ) for the comparative modern artiodactyl sample and the archaeocete crania studied here

| Species                       | Specimen       | $\delta 10/RC$ | $\delta 20/RC$ | $\delta 30/RC$ | $\delta 40/RC$ | $\delta 50/RC$ | $\delta 60/RC$ | $\delta 70/RC$ | $\delta 80/RC$ | $\delta 90/RC$ | Mean $\delta x/RC$ | Zero mean dist.        |
|-------------------------------|----------------|----------------|----------------|----------------|----------------|----------------|----------------|----------------|----------------|----------------|--------------------|------------------------|
| <i>Alces americana</i>        | UM no number   | -0.0017        | 0.0000         | 0.0000         | -0.0024        | -0.0051        | -0.0042        | 0.0000         | 0.0019         | 0.0019         | -0.0011            | 0.0004                 |
| <i>Alces americana</i>        | UM R 1437      | -0.0040        | -0.0040        | -0.0067        | -0.0071        | -0.0052        | -0.0056        | -0.0040        | -0.0025        | -0.0025        | -0.0046            | -0.0031                |
| <i>Antilocapra americana</i>  | UM R 1607      | 0.0044         | 0.0040         | -0.0018        | 0.0000         | -0.0018        | -0.0040        | -0.0080        | -0.0033        | -0.0033        | -0.0015            | 0.0000                 |
| <i>Antilocapra americana</i>  | UM R 1608      | 0.0000         | -0.0022        | -0.0089        | -0.0115        | -0.0115        | -0.0081        | -0.0044        | -0.0048        | -0.0048        | -0.0067            | -0.0047                |
| <i>Bison bison</i>            | UMMZ 156570    | 0.0013         | 0.0048         | 0.0077         | 0.0042         | 0.0038         | 0.0115         | 0.0119         | 0.0115         | 0.0038         | 0.0067             | 0.0082                 |
| <i>Bison bison</i>            | UMMZ 30061     | 0.0029         | -0.0130        | -0.0116        | -0.0086        | -0.0102        | -0.0049        | -0.0120        | 0.0024         | -0.0035        | -0.0065            | -0.0050                |
| <i>Bison bison</i>            | UMMZ 61294     | 0.0031         | 0.0000         | 0.0000         | 0.0000         | 0.0000         | -0.0015        | 0.0031         | 0.0072         | 0.0013         | 0.0015             | 0.0030                 |
| <i>Bos taurus</i>             | UM no number   | 0.0000         | -0.0036        | -0.0040        | -0.0040        | -0.0051        | -0.0044        | -0.0065        | 0.0046         | 0.0046         | -0.0020            | -0.0005                |
| <i>Camelus bactrianus</i>     | UMMZ 4619      | 0.0000         | 0.0000         | -0.0015        | -0.0036        | 0.0000         | 0.0000         | 0.0000         | 0.0040         | 0.0040         | 0.0003             | 0.0018                 |
| <i>Camelus dromedarius</i>    | UM no number   | 0.0000         | 0.0000         | -0.0085        | -0.0028        | -0.0059        | -0.0074        | -0.0093        | -0.0066        | -0.0066        | -0.0052            | -0.0037                |
| <i>Camelus dromedarius</i>    | UMMZ 122700    | 0.0000         | 0.0000         | -0.0043        | -0.0050        | -0.0050        | -0.0035        | -0.0052        | -0.0013        | -0.0013        | -0.0028            | -0.0013                |
| <i>Cervus canadensis</i>      | UM J 59        | 0.0000         | -0.0043        | -0.0051        | -0.0047        | -0.0043        | -0.0029        | -0.0070        | -0.0051        | -0.0051        | -0.0043            | -0.0028                |
| <i>Cervus canadensis</i>      | UM no number   | 0.0000         | 0.0000         | -0.0010        | 0.0048         | 0.0000         | -0.0044        | -0.0032        | -0.0038        | -0.0038        | -0.0013            | 0.0002                 |
| <i>Cervus canadensis</i>      | UMMZ 175461    | 0.0062         | 0.0115         | 0.0148         | 0.0167         | 0.0153         | 0.0139         | 0.0096         | 0.0072         | 0.0029         | 0.0109             | 0.0124                 |
| <i>Cervus canadensis</i>      | UMMZ 59799     | 0.0000         | -0.0014        | 0.0009         | 0.0030         | 0.0035         | 0.0026         | 0.0014         | -0.0019        | 0.0000         | 0.0009             | 0.0024                 |
| <i>Cervus canadensis</i>      | UMMZ 62122     | 0.0040         | -0.0044        | -0.0009        | 0.0009         | 0.0044         | 0.0044         | 0.0042         | 0.0000         | 0.0000         | 0.0014             | 0.0029                 |
| <i>Giraffa camelopardalis</i> | UM J 17        | 0.0009         | 0.0014         | 0.0014         | 0.0009         | 0.0000         | 0.0000         | -0.0043        | 0.0000         | 0.0000         | 0.0000             | 0.0015                 |
| <i>Hippopotamus amphibius</i> | UMMZ 112380    | -0.0062        | -0.0040        | -0.0052        | -0.0030        | -0.0023        | -0.0028        | -0.0013        | -0.0039        | -0.0039        | -0.0036            | -0.0021                |
| <i>Hippopotamus amphibius</i> | UMMZ 112381    | -0.0080        | -0.0100        | -0.0097        | -0.0084        | -0.0071        | -0.0020        | -0.0033        | -0.0080        | -0.0080        | -0.0072            | -0.0057                |
| <i>Hippopotamus amphibius</i> | UMMZ 84041     | -0.0116        | -0.0116        | -0.0098        | -0.0111        | -0.0081        | -0.0197        | -0.0050        | -0.0026        | -0.0026        | -0.0091            | -0.0076                |
| <i>Oreamnos montanus</i>      | UM R 1438      | 0.0027         | 0.0043         | -0.0077        | -0.0060        | -0.0057        | 0.0070         | -0.0083        | -0.0073        | -0.0073        | -0.0047            | -0.0032                |
| <i>Sus cristatus</i>          | UM 52          | 0.0000         | 0.0000         | 0.0019         | 0.0055         | 0.0000         | 0.0069         | 0.0080         | 0.0025         | 0.0025         | 0.0030             | 0.0045                 |
| <i>Sus scrofa</i>             | UM J 41        | 0.0009         | 0.0020         | 0.0046         | 0.0057         | 0.0046         | 0.0000         | 0.0000         | 0.0000         | 0.0000         | 0.0020             | 0.0035                 |
| <i>Sus scrofa</i>             | UMMZ no number | -0.0064        | -0.0064        | -0.0042        | 0.0000         | -0.0016        | -0.0013        | -0.0026        | -0.0016        | -0.0016        | -0.0028            | -0.0013                |
| <i>Basilosaurus isis</i>      | WH-74          | 0.0137         | 0.0158         | 0.0238         | 0.0332         | 0.0269         | 0.0190         | 0.0142         | 0.0135         | -0.0046        | 0.0173             | Mean of means = 0.0000 |
| <i>Basilosaurus isis</i>      | SMNS 11787     | 0.0032         | -0.0011        | 0.0009         | 0.0015         | 0.0040         | 0.0038         | 0.0023         | 0.0052         | 0.0055         | 0.0028             |                        |
| <i>Dorudon atrox</i>          | UM 101222      | 0.0093         | 0.0155         | 0.0222         | 0.0240         | 0.0237         | 0.0240         | 0.0208         | 0.0225         | 0.0149         | 0.0197             |                        |
| <i>Dorudon atrox</i>          | SMF 4451       | 0.0028         | 0.0074         | 0.0138         | 0.0175         | 0.0246         | 0.0291         | 0.0319         | 0.0351         | 0.0239         | 0.0207             |                        |
| <i>Artiocetus clavii</i>      | GSP-UM 3458    | 0.0144         | 0.0180         | 0.0229         | 0.0187         | 0.0123         | 0.0130         | 0.0127         | 0.0120         | 0.0085         | 0.0147             |                        |
| <i>Quiracetus arifi</i>       | GSP-UM 3316    | 0.0047         | 0.0058         | 0.0091         | 0.0058         | 0.0034         | 0.0078         | 0.0151         | 0.0082         | 0.0077         | 0.0075             |                        |

dist., distribution; SD, standard deviation.

**Table S2. Descriptive and t-test statistics for the archaeocete crania studied here**

| Species                  | Specimen       | Test | Y2: Symmetrical model artiodactyl sample |        |        | Y1: Archaeocete test sample |        |        | t-test worksheet |          |        | Results   |        |
|--------------------------|----------------|------|------------------------------------------|--------|--------|-----------------------------|--------|--------|------------------|----------|--------|-----------|--------|
|                          |                |      | N                                        | Mean   | SD     | N                           | Mean   | SD     | Num              | Denom1   | Denom2 | Student t | P      |
| <i>Basilosaurus isis</i> | WH-74          | 1    | 24                                       | 0.0000 | 0.0045 | 1                           | 0.0173 | 0.0000 | 0.0173           | 0.000020 | 1.0417 | 3.7419    | 0.0011 |
| <i>Basilosaurus isis</i> | SMNS 11787     | 2    | 24                                       | 0.0000 | 0.0045 | 1                           | 0.0028 | 0.0000 | 0.0028           | 0.000020 | 1.0417 | 0.6073    | 0.5496 |
| <i>Basilosaurus isis</i> | Both two above | 3    | 24                                       | 0.0000 | 0.0045 | 2                           | 0.0100 | 0.0102 | 0.0100           | 0.000024 | 0.5417 | 2.7861    | 0.0103 |
| <i>Dorudon atrox</i>     | UM 101222      | 4    | 24                                       | 0.0000 | 0.0045 | 1                           | 0.0197 | 0.0000 | 0.0197           | 0.000020 | 1.0417 | 4.2617    | 0.0003 |
| <i>Dorudon atrox</i>     | SMF 4451       | 5    | 24                                       | 0.0000 | 0.0045 | 1                           | 0.0207 | 0.0000 | 0.0207           | 0.000020 | 1.0417 | 4.4825    | 0.0002 |
| <i>Dorudon atrox</i>     | Both two above | 6    | 24                                       | 0.0000 | 0.0045 | 2                           | 0.0202 | 0.0007 | 0.0202           | 0.000020 | 0.5417 | 6.1900    | 0.0000 |
| <i>Artiocetus clavis</i> | GSP-UM 3458    | 7    | 24                                       | 0.0000 | 0.0045 | 1                           | 0.0147 | 0.0000 | 0.0147           | 0.000020 | 1.0417 | 3.1886    | 0.0041 |
| <i>Qaisracetus arifi</i> | GSP-UM 3316    | 8    | 24                                       | 0.0000 | 0.0045 | 1                           | 0.0075 | 0.0000 | 0.0075           | 0.000020 | 1.0417 | 1.6272    | 0.1173 |
| <i>All archaeocetes</i>  | All six above  | 9    | 24                                       | 0.0000 | 0.0045 | 6                           | 0.0138 | 0.0071 | 0.0138           | 0.000026 | 0.2083 | 5.9289    | 0.0000 |

Note that all archaeocete midline sutures deviate to the right (orange), the six archaeocetes as a group deviate significantly more than expected for a symmetrical sample, and four of the six individual archaeocete crania deviate significantly more than expected for a symmetrical sample. Yellow-cell t values are significant at  $P < 0.05$ . Blue-cell t values are not significant. Denom, denominator; N, sample size; Num, numerator; P, probability; SD, standard deviation.
